# Supplementary material
Source: HighWire-hosted journal article supplement (https://www.genetics.org/content/suppl/2013/08/16/genetics.113.153981)
Supplement: genetics.113.153981-2.pdf [file genetics.113.153981-2.pdf]

**Table S2 Plasmids used in this study**

| plasmid | backbone | yeast selection | insert      | source            |
|---------|----------|-----------------|-------------|-------------------|
| pJR2541 | pRS315   | LEU2            | DOT1        | van Leeuwen, 2002 |
| pJR2542 | pRS315   | LEU2            | dot1(G401A) | van Leeuwen, 2002 |
